# Supplementary material for: Fluorescence and photochromic properties of a series of new Zn(ii)/Cd(ii) coordination compounds with a flexible semi-rigid tetrazole–viologen derivative
Source: Royal Society of Chemistry journal article supplement (doi:10.1039/c6ce00317f), 2016-01-01

## Fluorescent and photochromic properties of a series of new Zn(II)/Cd(II) coordination compounds with a flexible semi-rigid tetrazole-viologen derivative

Yu Xiao,<sup>ab</sup> Shuai-Hua Wang,<sup>\*a</sup> Ya-Ping Zhao,<sup>ab</sup> Fa-Kun Zheng,<sup>\*a</sup> and Guo-Cong Guo<sup>a</sup>

*a* State Key Laboratory of Structural Chemistry, Fujian Institute of Research on the Structure of Matter, Chinese Academy of Sciences, Fuzhou, Fujian, 350002, PR China. E-mail: zfk@fjirsm.ac.cn; Fax: +86 591 6317 3068; Tel: +86 591 63173889

*b* University of Chinese Academy of Sciences, Beijing 100039, PR China

**Table S1** The selected bond distances (Å) and angles (°) for **1–4**.

| <b>1</b>                                                                                                         |            |                  |            |
|------------------------------------------------------------------------------------------------------------------|------------|------------------|------------|
| Zn1–N26                                                                                                          | 2.039(4)   | Zn2–N16          | 2.071(4)   |
| Zn1–Cl1                                                                                                          | 2.304(3)   | Zn2–N21          | 2.030(4)   |
| Zn1–N11                                                                                                          | 2.014(4)   | Zn2–N27          | 2.034(4)   |
| Zn1–N17                                                                                                          | 1.9005(15) | Zn2–Cl2          | 2.2328(15) |
| N17–Zn1–N11                                                                                                      | 106.45(10) | N21–Zn2–N27      | 107.60(17) |
| N17–Zn1–N26                                                                                                      | 113.50(12) | N21–Zn2–N16      | 106.85(15) |
| N11–Zn1–N26                                                                                                      | 105.49(15) | N27–Zn2–N16      | 110.40(18) |
| N17–Zn1–Cl1                                                                                                      | 113.23(8)  | N21–Zn2–Cl2      | 108.16(12) |
| N11–Zn1–Cl1                                                                                                      | 108.21(12) | N27–Zn2–Cl2      | 117.91(13) |
| N26–Zn1–Cl1                                                                                                      | 109.50(11) | N16–Zn2–Cl2      | 105.41(10) |
| <b>2</b>                                                                                                         |            |                  |            |
| Zn(1)–N(7)                                                                                                       | 2.001(4)   | Zn(1)–N(3)#1     | 2.024(3)   |
| Zn(1)–N(1)                                                                                                       | 2.033(3)   | Zn(1)–Cl(1)      | 2.2094(14) |
| N(7)–Zn(1)–N(3)#1                                                                                                | 106.96(13) | N(7)–Zn(1)–N(1)  | 111.80(14) |
| N(3)#1–Zn(1)–N(1)                                                                                                | 102.16(11) | N(7)–Zn(1)–Cl(1) | 112.02(11) |
| N(3)#1–Zn(1)–Cl(1)                                                                                               | 112.75(9)  | N(1)–Zn(1)–Cl(1) | 110.72(8)  |
| Symmetry transformations used to generate equivalent atoms:<br>#1 x, –y + 1/2, z – 1/2; #2 x, –y + 1/2, z + 1/2. |            |                  |            |
| <b>3</b>                                                                                                         |            |                  |            |
| Zn(1)–O(1)                                                                                                       | 1.915(3)   | Zn(1)–N(1)       | 2.028(4)   |
| Zn(1)–N(6)#1                                                                                                     | 2.065(4)   | Zn(1)–Cl(1)      | 2.2298(16) |
| Zn(2)–O(1)                                                                                                       | 1.946(3)   | Zn(2)–N(4)#2     | 2.077(4)   |
| Zn(2)–Cl(2)                                                                                                      | 2.2289(15) | Zn(2)–Cl(3)      | 2.2512(15) |

|                    |            |                    |            |
|--------------------|------------|--------------------|------------|
| O(1)-Zn(1)-N(1)    | 112.38(16) | O(1)-Zn(1)-N(6)#1  | 110.05(16) |
| N(1)-Zn(1)-N(6)#1  | 104.79(17) | O(1)-Zn(1)-Cl(1)   | 117.55(11) |
| N(1)-Zn(1)-Cl(1)   | 108.18(12) | N(6)#1-Zn(1)-Cl(1) | 102.76(12) |
| O(1)-Zn(2)-N(4)#2  | 105.96(15) | O(1)-Zn(2)-Cl(2)   | 118.90(12) |
| N(4)#2-Zn(2)-Cl(2) | 105.69(12) | O(1)-Zn(2)-Cl(3)   | 104.49(11) |
| N(4)#2-Zn(2)-Cl(3) | 102.86(12) | Cl(2)-Zn(2)-Cl(3)  | 117.28(6)  |

Symmetry transformations used to generate equivalent atoms:

#1  $-x + 1, -y + 2, -z + 1$ ; #2  $x - 1, y, z$ ; #3  $x + 1, y, z$ .

**4**

|                     |            |                     |            |
|---------------------|------------|---------------------|------------|
| Cd(1)-N(7)          | 2.282(2)   | Cd(1)-O(2)#1        | 2.2896(18) |
| Cd(1)-O(1)          | 2.3086(17) | Cd(1)-N(1)          | 2.376(2)   |
| Cd(1)-N(6)#2        | 2.399(2)   | Cd(1)-N(4)#3        | 2.452(2)   |
| N(7)-Cd(1)-O(2)#1   | 175.31(7)  | N(7)-Cd(1)-O(1)     | 104.02(7)  |
| O(2)#1-Cd(1)-O(1)   | 72.49(6)   | N(7)-Cd(1)-N(1)     | 98.02(8)   |
| O(2)#1-Cd(1)-N(1)   | 85.53(6)   | O(1)-Cd(1)-N(1)     | 157.95(6)  |
| N(7)-Cd(1)-N(6)#2   | 92.36(8)   | O(2)#1-Cd(1)-N(6)#2 | 90.54(7)   |
| O(1)-Cd(1)-N(6)#2   | 86.10(7)   | N(1)-Cd(1)-N(6)#2   | 92.61(7)   |
| N(7)-Cd(1)-N(4)#3   | 89.56(8)   | O(2)#1-Cd(1)-N(4)#3 | 86.84(7)   |
| O(1)-Cd(1)-N(4)#3   | 81.83(7)   | N(1)-Cd(1)-N(4)#3   | 98.97(7)   |
| N(6)#2-Cd(1)-N(4)#3 | 167.88(7)  |                     |            |

Symmetry transformations used to generate equivalent atoms:

#1  $-x + 1, -y + 1, -z$ ; #2  $-x + 2, -y, -z$ ; #3  $-x + 1, y + 1/2, -z + 1/2$ .

**Fig. S1** The IR spectra of (cmb)Cl, (Htzmb)Cl and 1–4.

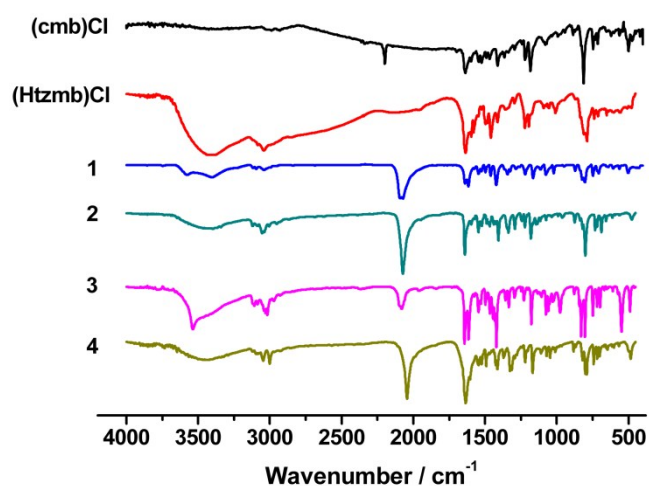

**Fig. S2** The TGA curves of 1–4.

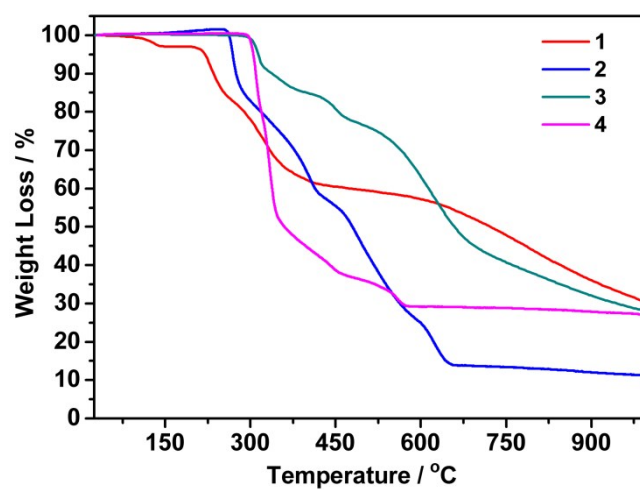

**Fig. S3** Powdered X-ray diffraction (PXRD) patterns of 1–4.

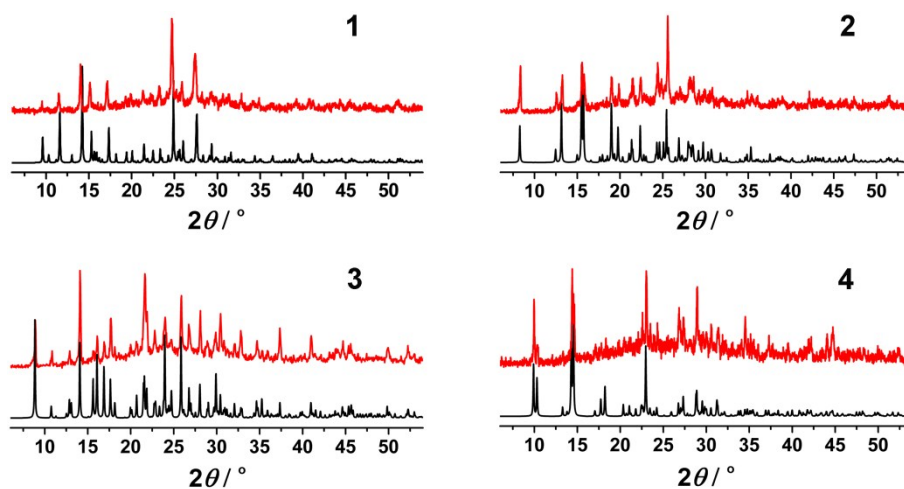

**Fig. S4** Overlapping stack of adjacent zigzag chains in **2** with  $\pi \cdots \pi$  interactions.

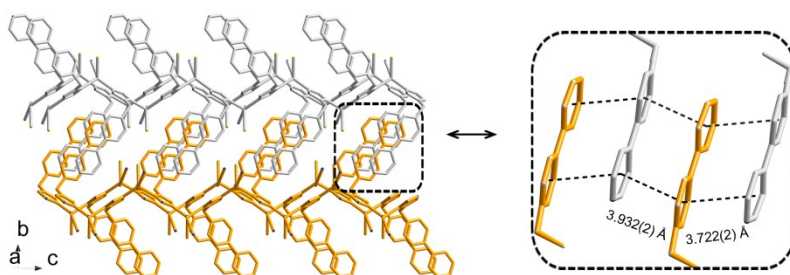

**Fig. S5** An  $\cdots$ ABAB $\cdots$  fashion along the *c* axis for **3**.

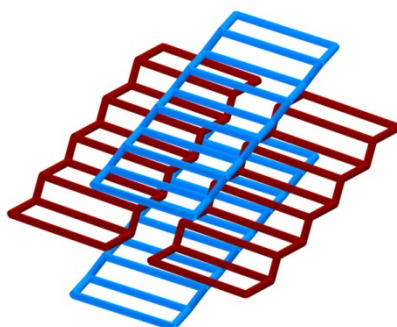

**Fig. S6** The excitation (black line) and emission (red line) spectra of free ligand tzmb.

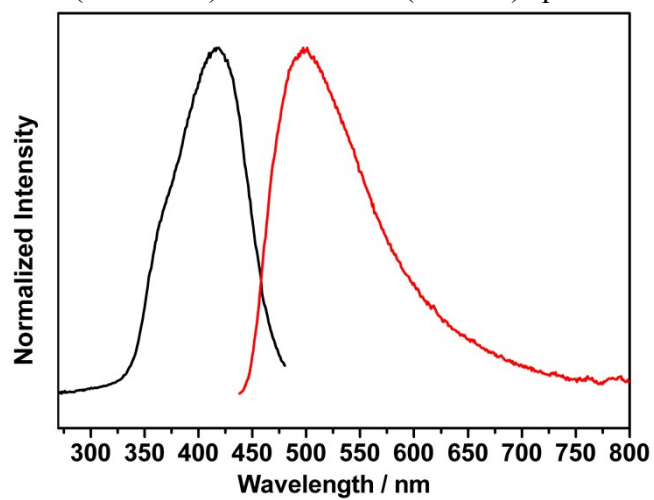

**Fig. S7** Fluorescence lifetime investigation of 1–4.

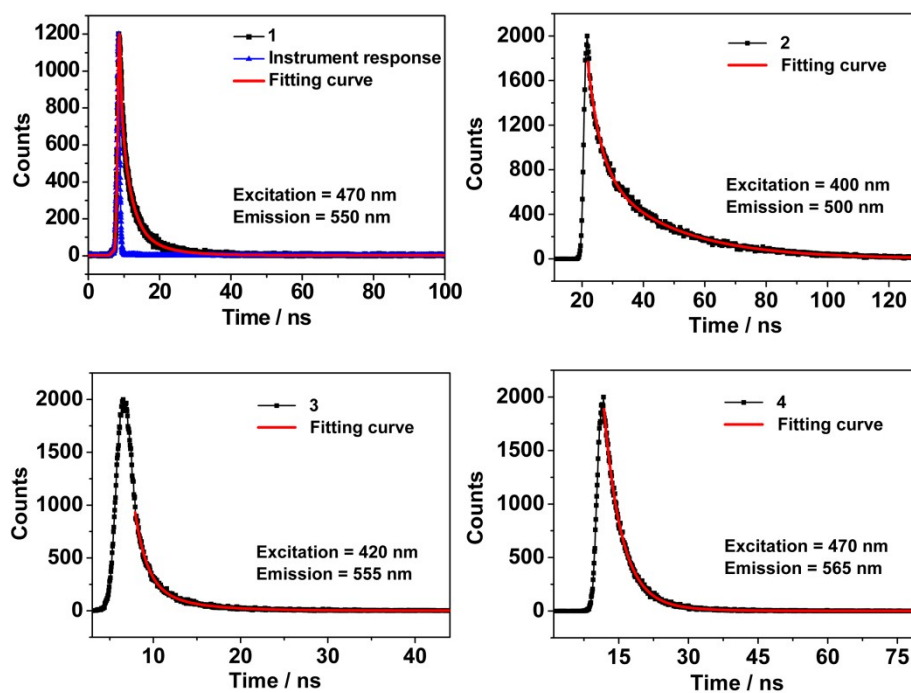

**Fig. S8** The dinuclear SBU  $[M_2(tzmb)_2]$  ( $M = Zn$  or  $Cd$ ) in the structures of compounds 1, 3 and 4

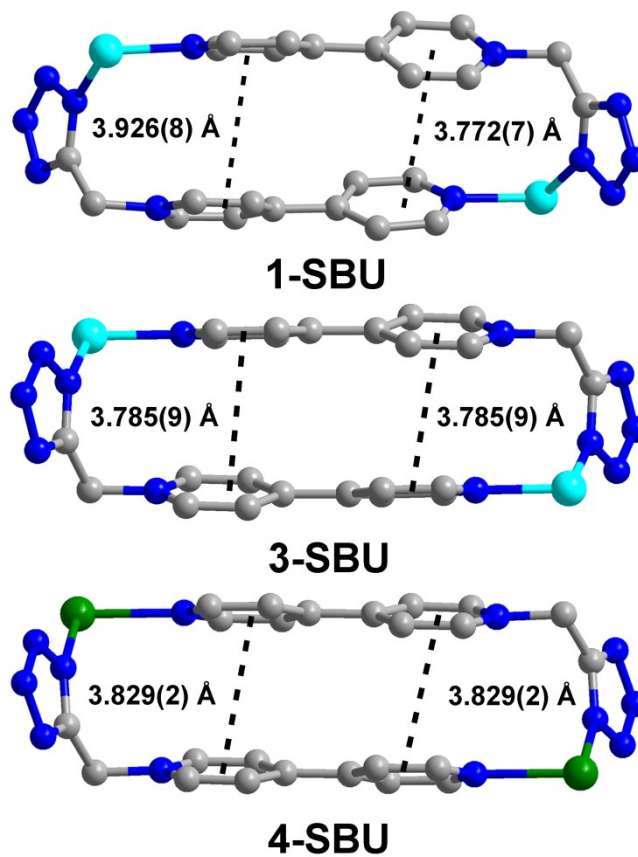

**Fig. S9** Calculated spin density of the  $[\text{Zn}_2\text{Cl}_2(\text{N}_3)_2(\text{tzmb})_2]$  molecule of **1** in the triplet ground state.

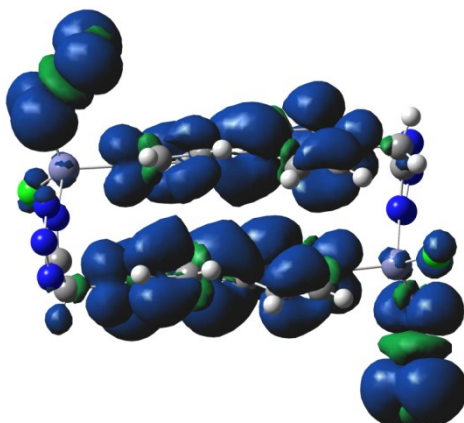

Supplement: c6ce00317f1.pdf [file c6ce00317f1.pdf]
